# Supplementary material for: Cloning and Characterization of TpNRAMP3, a Metal Transporter From Polish Wheat (Triticum polonicum L.)
Source: PubMed Central journal article supplement (PMC6158329; doi:10.3389/fpls.2018.01354), 2018-09-20
Supplement: Table_1.pdf [file Table_1.pdf]

**Supplementary Table 1 The CIS regulatory elements between *TpNRAMP3* and *OsNRAMP3*.**

| Gene            | Cis-acting element     | Function                                                              |
|-----------------|------------------------|-----------------------------------------------------------------------|
| <i>TpNRAMP3</i> | 3-AF1 binding site     | Light responsive element                                              |
|                 | 5' UTR Py-rich stretch | Element conferring high transcription levels                          |
|                 | A-box                  | Cis-acting regulatory element                                         |
|                 | ABRE                   | Cis-acting element involved in the abscisic acid responsiveness       |
|                 | AE-box                 | Part of a module for light response                                   |
|                 | CAAT-box               | Common cis-acting element in promoter and enhancer regions            |
|                 | CAT-box                | Cis-acting regulatory element related to meristem expression          |
|                 | CCGTCC-box             | Cis-acting regulatory element related to meristem specific activation |
|                 | CGTCA-motif            | Cis-acting regulatory element involved in the MeJA- responsiveness    |
|                 | G-box                  | Cis-acting regulatory element involved in light responsiveness        |
|                 | GAG-motif              | Part of a light responsive element                                    |
|                 | GARE-motif             | Gibberellin-responsive element                                        |
|                 | GCN4_motif             | Cs-regulatory element involved in endosperm expression                |
|                 | GT1-motif              | Light responsive element                                              |
|                 | I-box                  | Part of a light responsive element                                    |
|                 | L-box                  | Part of a light responsive element                                    |
|                 | Skn-1_motif            | Cis-acting regulatory element required for endosperm expression       |
|                 | Sp1                    | Light responsive element                                              |
|                 | TATA-box               | Core promoter element around -30 of transcription start               |

---

|                 |                 |                                                                    |
|-----------------|-----------------|--------------------------------------------------------------------|
|                 | TATC-box        | Cis-acting element involved in gibberellin-responsiveness          |
|                 | TC-rich repeats | Cis-acting element involved in defense and stress responsiveness   |
|                 | TCA-element     | Cis-acting element involved in salicylic acid responsiveness       |
|                 | TCT-motif       | Part of a light responsive element                                 |
|                 | TGACG-motif     | Cis-acting regulatory element involved in the MeJA-responsiveness  |
| <i>OsNRAMP3</i> | ABRE            | Cis-acting element involved in the abscisic acid responsiveness    |
|                 | ACE             | Cis-acting element involved in light responsiveness                |
|                 | ATCT-motif      | Part of a conserved DNA module involved in light responsiveness    |
|                 | CAAT-box        | Common cis-acting element in promoter and enhancer regions         |
|                 | CAT-box         | Cis-acting regulatory element related to meristem expression       |
|                 | CGTCA-motif     | Cis-acting regulatory element involved in the MeJA- responsiveness |
|                 | G-box           | Cis-acting regulatory element involved in light responsiveness     |
|                 | GAG-motif       | Part of a light responsive element                                 |
|                 | GARE-motif      | Gibberellin-responsive element                                     |
|                 | GCN4_motif      | Cis-regulatory element involved in endosperm expression            |
|                 | I-box           | Part of a light responsive element                                 |
|                 | MBS             | MYB binding site involved in drought-inducibility                  |
|                 | Skn-1_motif     | Cis-acting regulatory element required for endosperm expression    |
|                 | Sp1             | Light responsive element                                           |
|                 | TATA-box        | Core promoter element around -30 of transcription start            |
|                 | TCT-motif       | Part of a light responsive element                                 |
|                 | TGACG-motif     | Cis-acting regulatory element involved in the MeJA-responsiveness  |

---

---

|           |                                                             |
|-----------|-------------------------------------------------------------|
| Circadian | Cis-acting regulatory element involved in circadian control |
|-----------|-------------------------------------------------------------|

|            |                                    |
|------------|------------------------------------|
| rbcS-CMA7a | Part of a light responsive element |
|------------|------------------------------------|

---

Note: yellow marked the *TpNRAMP3*-specific CIS regulatory elements; green marked the *OsNRAMP3*-specific CIS regulatory elements.

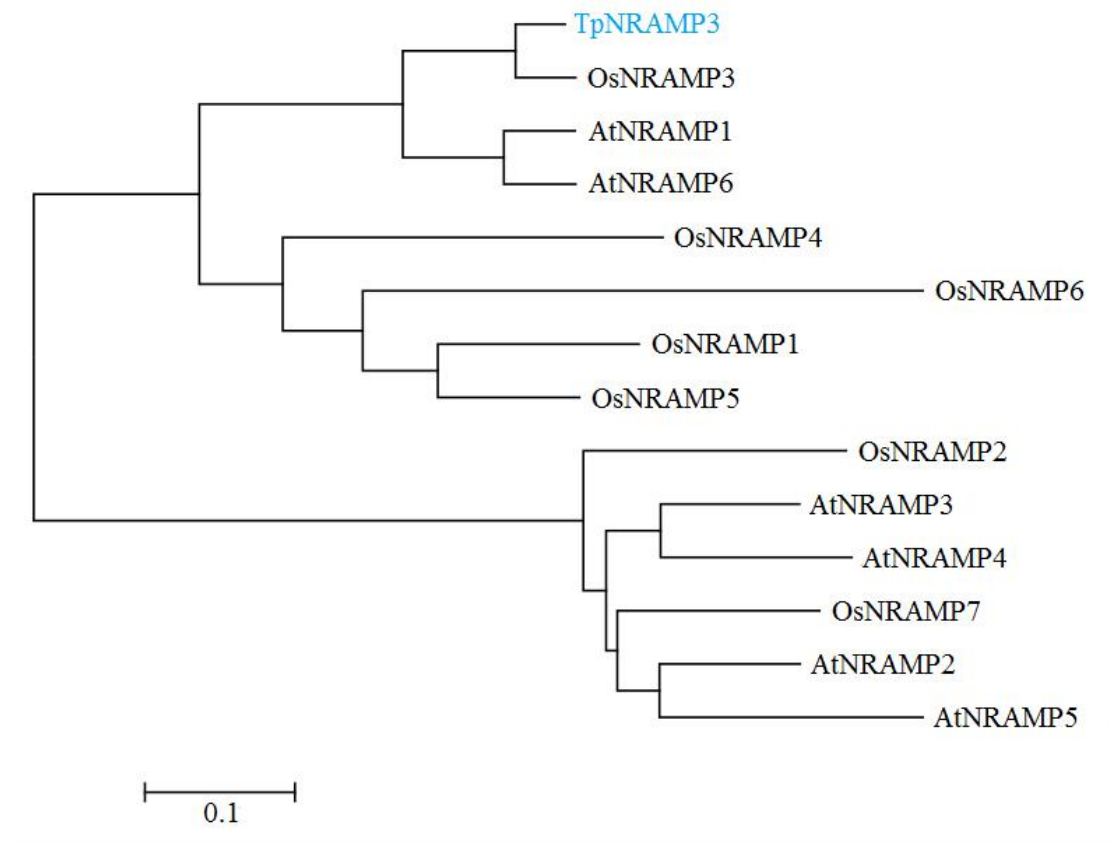

**Fig S1.** TpNRAMP3 is closely grouped with OsNRAMP3.

TpNRAMP3 (KX165384), 7 OsNRAMP proteins and 6 AtNRAMP proteins, including OsNRAMP1 (AK121534), OsNRAMP2 (L81152), OsNRAMP3 (AK070574), OsNRAMP4 (LOC\_Os02g03900), OsNRAMP5 (AK070788), OsNRAMP6 (XM\_015762723), OsNRAMP7 (LOC\_Os12G39180), AtNRAMP1 (AF165125), AtNRAMP2 (AF141204), AtNRAMP3 (AF202539), AtNRAMP4 (AF202540), AtNRAMP5 (NM\_117995.2), AtNRAMP6 (NM\_101464.4), were aligned using Vector NTI 11.5.1; the phylogenetic tree of the NRAMP proteins was constructed using MEGA5.

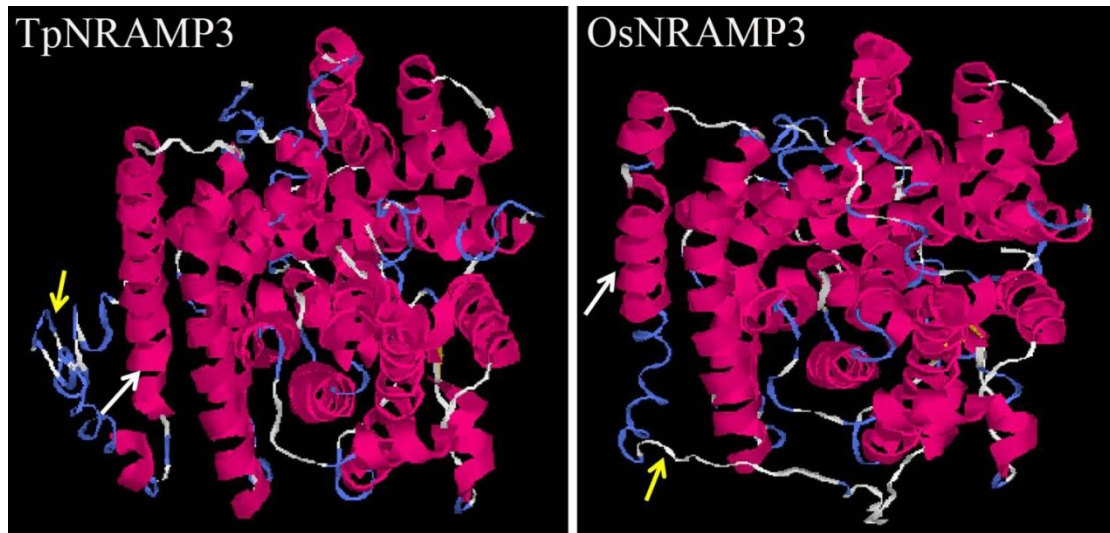

**Fig S2.** Protein structures of TpNRAMP3 and OsNRAMP3.

The protein structures of TpNRAMP3 and OsNRAMP3 were predicted using the software of I-TASSER. The white arrows represented the  $\alpha$ -helix; the yellow arrows represented the random coil.

|          |       |                                                                                       |
|----------|-------|---------------------------------------------------------------------------------------|
| OsNRAMP3 | (1)   | MSGPMQRSSQPQFIS <sup>100</sup> SVERNN-QSNGPGTPLIDSIDVDQIVIPEKNSWKN                    |
| TpNRAMP3 | (1)   | MSGPRQGSSQPQFMT <sup>100</sup> SVGQNNLSNGPGTPLIDSIDVDQIVIPEKNSWKN                     |
| OsNRAMP3 | (50)  | LFSYIGPGFLVSIAYIDPGNFETDLQAGAQYKYELLWIIILIASCAALIIQ                                   |
| TpNRAMP3 | (51)  | <u>LFSYIGPGFLVSIAYIDPGNFETDLQAGAQYKYELLWIIILIASCAALVIQ</u>                            |
|          |       | TM1 TM2                                                                               |
| OsNRAMP3 | (100) | SLAARLGVVVTGKHLAEHCRAEYPKATNFILWILAE LAVVACDIPEVIGTA                                  |
| TpNRAMP3 | (101) | <u>SLAASLGVVVTGKHLAEHCRAEYPKVTNFILWILAE LAVVACDIPEVIGTA</u>                           |
|          |       | TM3                                                                                   |
| OsNRAMP3 | (150) | FALNMLFKIPVWCGVLITGLSTLM <sup>100</sup> LLLQOYGVRKLEFLIAILVSLIATC                     |
| TpNRAMP3 | (151) | <u>FALNMLFKIPITWCGVLITGLSTLM<sup>100</sup>LLFLQOYGVRKLEFLIAFLVFLIATC</u>              |
|          |       | TM4 TM5                                                                               |
| OsNRAMP3 | (200) | FLVELGYSKPNSSEVV <sup>100</sup> RGLFVPEIKGNGATGLAISLLGAMVMPHNFLHLS                    |
| TpNRAMP3 | (201) | <u>FLVELGYSKPNSSEVV<sup>100</sup>RGLFVPEIKGDGATGLAISLLGAMVMPHNFLHLS</u>               |
| OsNRAMP3 | (250) | ALVLSRKVPRSVHGIKEACRFYMIESAFALTIAFLINISIIISVSGAVCGS                                   |
| TpNRAMP3 | (251) | ALVLSRKVPRSVHGIKEACRFYMIESAFALTVAFLINISIIISVSGAVCSA                                   |
|          |       | TM6                                                                                   |
| OsNRAMP3 | (300) | DNLSPEDQMNCSDLDLNKASFL <sup>100</sup> LKNV LGNWSSKLFVAVALLASGQSSTITG                  |
| TpNRAMP3 | (301) | DNLNPEDRMNCNDLDLNKASFL <sup>100</sup> LKNV LGNWSSKVF <sup>100</sup> SIALLASGQSSTITG   |
|          |       | TM7                                                                                   |
| OsNRAMP3 | (350) | TYAGQYVMQGF <sup>100</sup> DLRMTPIRNLLTRSLAILPSLIVSIIGGSSAAGQLII                      |
| TpNRAMP3 | (351) | <u>TYAGQYVMQGF<sup>100</sup>DLRMTPIRNLLTRSLAIVPSLIVSLIGGSSAAGKLII</u>                 |
|          |       | TM8                                                                                   |
| OsNRAMP3 | (400) | IASMILSFELPFALVPLLKFTSS <sup>100</sup> RTKMGQHTNSKAISVITWIGIGSFIVVI                   |
| TpNRAMP3 | (401) | <u>IASMILSFELPFALVPLLKFTSS<sup>100</sup>RTKMGPHNTNSRFISVLTWAIIGSFIMVI</u>             |
|          |       | TM9 TM10                                                                              |
| OsNRAMP3 | (450) | NTYFLITSFV <sup>100</sup> KLLLHNGLSTVSQVFSGIFGFLGMLIYMAAILYL <sup>100</sup> VFRKNR    |
| TpNRAMP3 | (451) | <u>NIYFLITSFVR<sup>100</sup>LLLHSGLSTVSQVFSGIFGFLGMLIYIAAILYL<sup>100</sup>VFRKNR</u> |
|          |       | TM11                                                                                  |
| OsNRAMP3 | (500) | KATLPLLEGDS <sup>100</sup> TVRIVGRDTATEGEGSLGHL <sup>100</sup> PREDISSMQLPQORTASDL    |
| TpNRAMP3 | (501) | KCTLPLLECD <sup>100</sup> AKLGDAG---HTEGEGSLGHL <sup>100</sup> PREDISSMQLPHQRPASDL    |
| OsNRAMP3 | (550) | D                                                                                     |
| TpNRAMP3 | (548) | D                                                                                     |

**Fig S3.** Alignments between TpNRAMP5 and OsNRAMP5.

Black lines marked the transmembrane domains predicted by SOSUI. The shaded residues represented their consensus positions were 100%, but their identity positions were 0%.

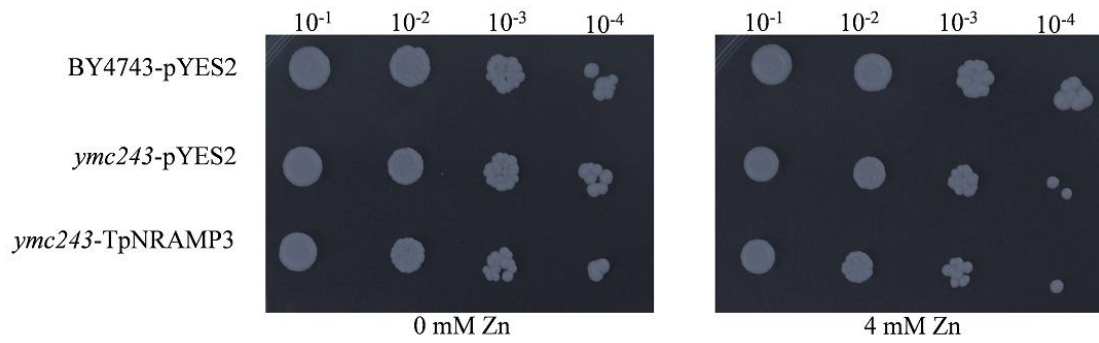

**Fig S4.** Zn sensitivity of TpNRAMP3 in yeast.

Expression of *TpNRAMP3* in Zn sensitive strain  $\Delta zrc1$  did not affect the yeast growth when compared with expressing pYES2 in  $\Delta zrc1$ .

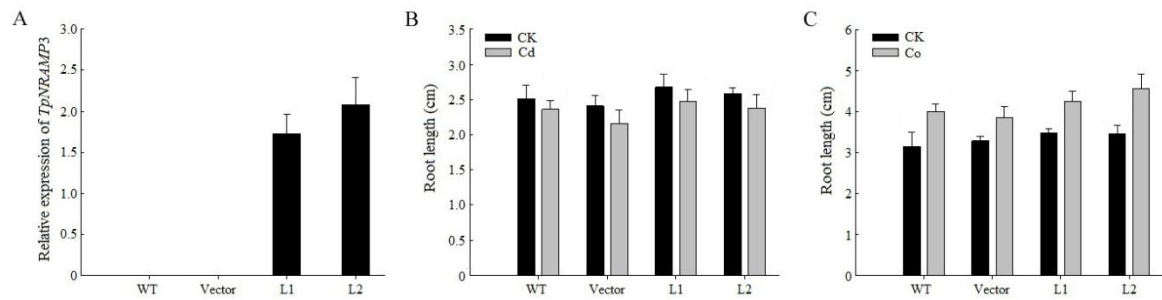

**Fig S5.** Expression of *TpNRAMP3* in transgenic *Arabidopsis* (A); and root length of transgenic *Arabidopsis* grown on 1/2 MS medium with 25  $\mu$ M Cd (B) and 80  $\mu$ M Co (C) stress for 10 days. Value was mean  $\pm$  standard deviation (three biological replicates).

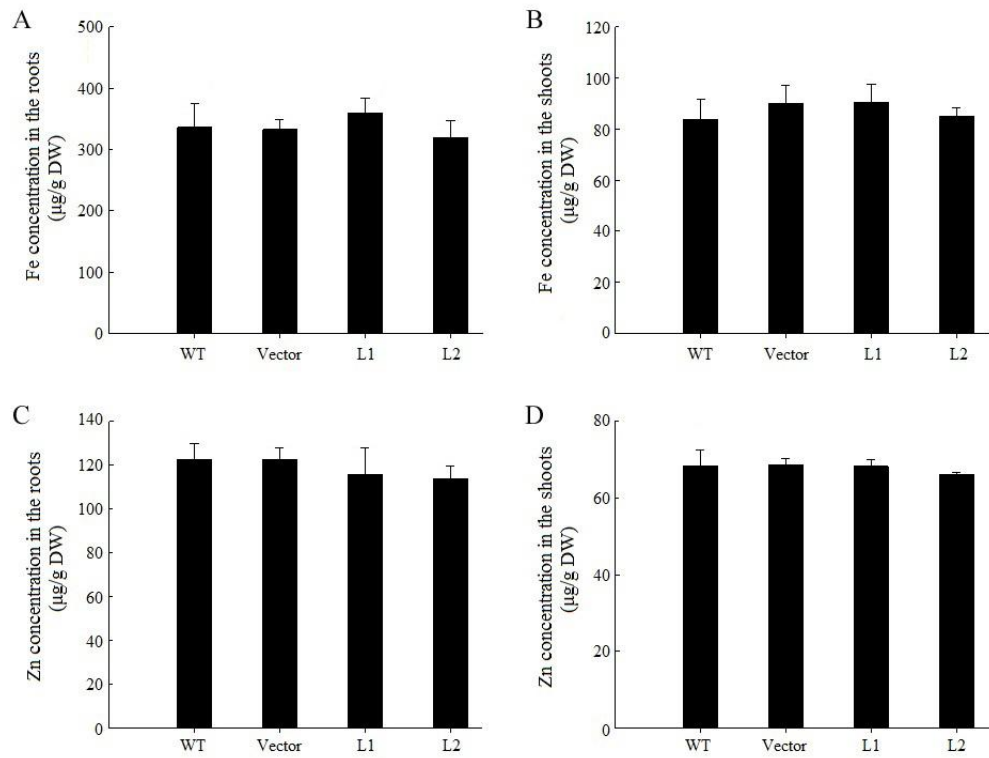

**Fig S6.** Fe and Zn accumulations in *TpNRAMP5* transgenic *Arabidopsis*.

A-B: Fe concentration in roots (A) and shoots (B); C-D: Zn concentration in roots (C) and shoots (D). Value was mean  $\pm$  standard deviation (three biological replicates).
